# Supplementary material for: Ternary In2S3/In2O3 heterostructures and their cathodoluminescence
Source: Royal Society of Chemistry journal article supplement (doi:10.1039/c6ra09520h), 2016-01-01
Supplement: c6ra09520h1.pdf [file c6ra09520h1.pdf]

## Supporting information

# Ternary $\text{In}_2\text{S}_3/\text{In}_2\text{O}_3$ heterostructures and their cathodoluminescence

Wenjin Yang,<sup>†</sup>Baodan Liu,<sup>†,\*</sup>Yujin Cho,<sup>§</sup>Bing Yang,<sup>†</sup>BenjaminDierre,<sup>§</sup> Takashi Sekiguchi,<sup>§</sup>Xin Jiang<sup>†,\*</sup>

<sup>†</sup>Shenyang National Laboratory for Materials Science (SYNL), Institute of Metal Research (IMR), Chinese Academy of Sciences (CAS), No. 72 Wenhua Road, Shenyang 110016 China

<sup>§</sup>Nano-Electronics Materials Unit, National Institute for Materials Science (NIMS), 1-1 Namiki, Tsukuba 305-0044, Japan

\*To whom correspondence should be addressed: [baodanliu@imr.ac.cn](mailto:baodanliu@imr.ac.cn)

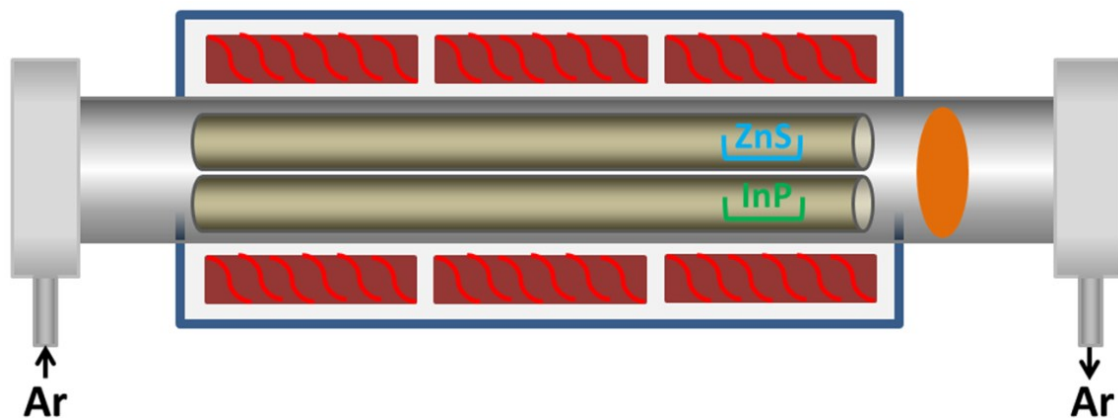

*Figure S1* Schematic of the experimental set-up for  $\text{In}_2\text{S}_3/\text{In}_2\text{O}_3$  heterostructure nanomaterials growth

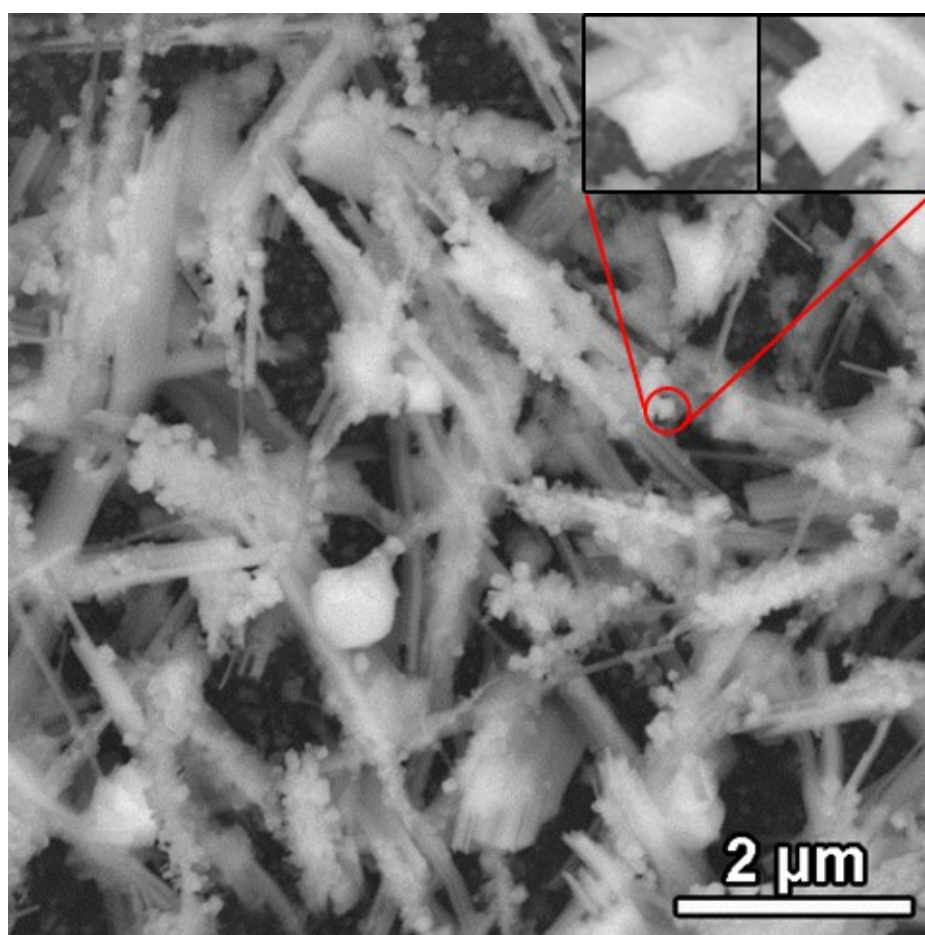

*Figure S2* The SEM image of  $\text{In}_2\text{S}_3/\text{In}_2\text{O}_3$  heterostructures grown on (111) silicon substrate

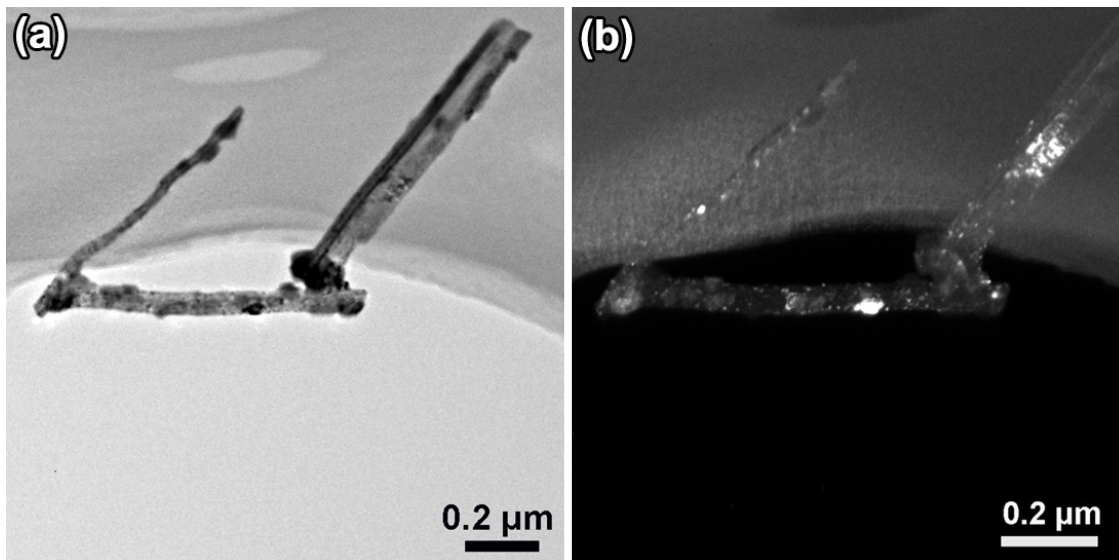

**Figure S3** (a) Bright field (BF) TEM image of samples; (b) dark field (DF) TEM image of samples

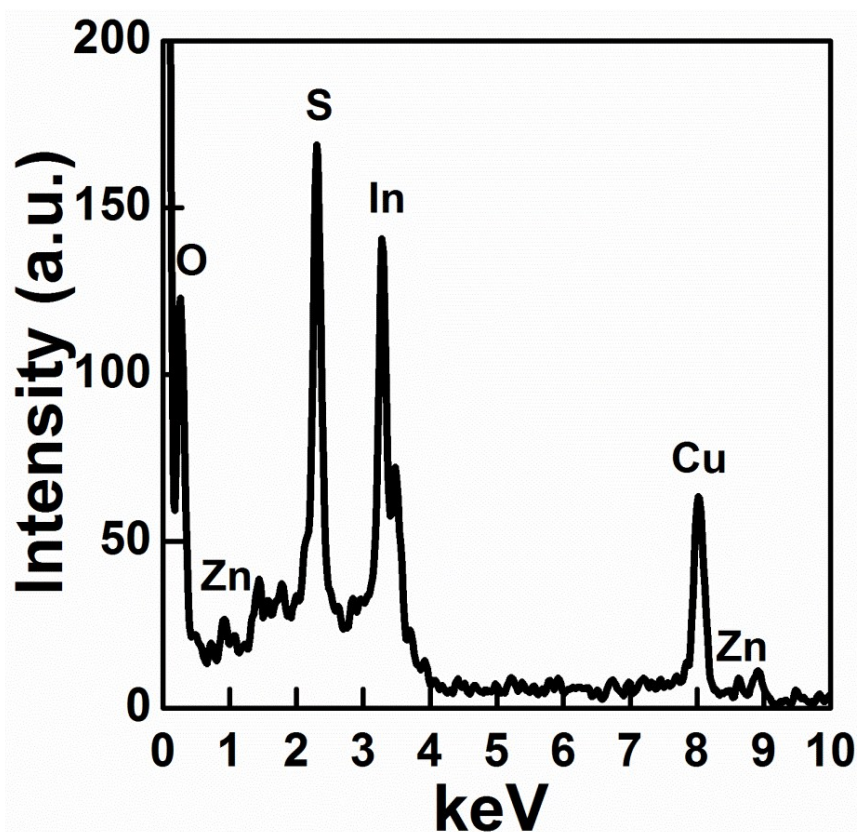

**Figure S4** The EDS spectrum of as-synthesized  $\text{In}_2\text{S}_3/\text{In}_2\text{O}_3$  heterostructure nanomaterials

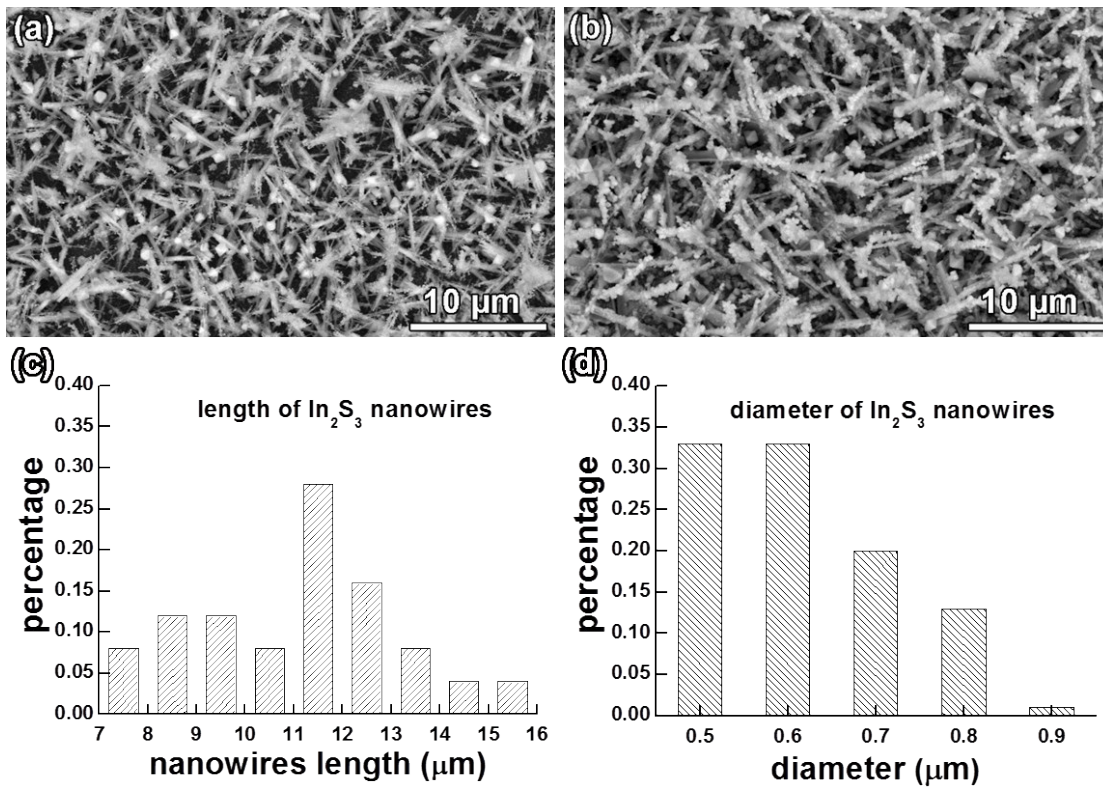

**Figure S5** (a-b) SEM images of as-fabricated  $\text{In}_2\text{S}_3/\text{In}_2\text{O}_3$  heterostructures; (c-d) The diagram column of the statistical distribution of the length and diameter of  $\text{In}_2\text{S}_3$  nanowires

| In <sub>2</sub> S <sub>3</sub> (PDF#65-0459) |       |       |      | In <sub>2</sub> O <sub>3</sub> (PDF#65-3170) |       |       |      |
|----------------------------------------------|-------|-------|------|----------------------------------------------|-------|-------|------|
| 2-Theta                                      | d(Å)  | h k l | I(v) | 2-Theta                                      | d(Å)  | h k l | I(v) |
| 14.227                                       | 6.220 | 111   | 18.6 | 17.477                                       | 5.070 | 200   | 0.1  |
| 23.333                                       | 3.809 | 220   | 15.0 | 21.448                                       | 4.139 | 211   | 8.4  |
| 27.433                                       | 3.248 | 311   | 100  | 24.815                                       | 3.585 | 220   | 0.1  |
| 28.679                                       | 3.110 | 222   | 9.9  | 30.514                                       | 2.927 | 222   | 100  |
| 33.235                                       | 2.693 | 400   | 50.6 | 33.026                                       | 2.710 | 123   | 1.1  |
| 36.316                                       | 2.471 | 331   | 4.2  | 35.379                                       | 2.535 | 400   | 33.5 |
| 41.005                                       | 2.199 | 422   | 9.0  | 37.603                                       | 2.390 | 411   | 5.4  |
| 43.616                                       | 2.073 | 511   | 58.4 | 39.720                                       | 2.267 | 420   | 0.9  |
| 47.711                                       | 1.904 | 440   | 99.2 | 41.747                                       | 2.161 | 332   | 4.5  |
| 50.044                                       | 1.821 | 531   | 9.1  | 43.696                                       | 2.069 | 422   | 0.8  |
| 50.804                                       | 1.795 | 442   | 0.2  | 45.579                                       | 1.988 | 134   | 9.4  |
| 53.766                                       | 1.703 | 620   | 4.2  | 49.174                                       | 1.851 | 125   | 2.2  |
| 55.915                                       | 1.643 | 533   | 19.6 | 50.899                                       | 1.792 | 440   | 57.7 |
| 56.620                                       | 1.624 | 622   | 8.6  | 52.584                                       | 1.739 | 433   | 2.7  |
| 59.383                                       | 1.555 | 444   | 14.4 | 54.231                                       | 1.690 | 600   | 0.5  |

**Table S1** The XRD data of cubic In<sub>2</sub>S<sub>3</sub> and In<sub>2</sub>O<sub>3</sub> compounds
